# Supplementary material
Source: publisher figshare collection journal article supplement (https://acs.figshare.com/ndownloader/files/23615019)
Supplement: Supplementary file 1 [file 23615019]

Archive with 3 entries (3 files):
- info.xml
- jz0c01173_high_quality.mp4
- jz0c01173.pdf
