# Supplementary material
Source: publisher figshare collection journal article supplement (https://acs.figshare.com/ndownloader/files/23615019)
Supplement: Supplementary file 1 [file 23615019 › info.xml]

<presentation>
	<article>
		<title>On Librational and Rotational Motions of Aromatic Rings in Layered Sn\(IV\) and Zr\(IV\) Phosphonate Materials: A Variable-Temperature 13C, 31P Solid-State NMR Study</title>
		<doi>10.1021/acs.jpclett.0c01173</doi>
		<copyright>American Chemical Society</copyright>
		<narrator>Aida Contreras-Ramirez</narrator>
		<contact>Aida Contreras-Ramirez</contact>
		<contact-email>aida.contreras@tamu.edu</contact-email>
		<author-list>
			<author>Hong-Cai Zhou</author>
		</author-list>
	</article>
	<slides height-width-ratio=".75">
		<slide audio-time="33">
			<subtitle/>
		</slide>
		<slide audio-time="48">
			<subtitle/>
		</slide>
		<slide audio-time="45">
			<subtitle/>
		</slide>
		<slide audio-time="101">
			<subtitle/>
		</slide>
		<slide audio-time="58">
			<subtitle/>
		</slide>
		<slide audio-time="107">
			<subtitle/>
		</slide>
		<slide audio-time="72">
			<subtitle/>
		</slide>
	</slides>
	<audio duration="464"/>
</presentation>
